# Supplementary material for: Mobile Point-of-Care Device Using Molecularly Imprinted Polymer-Based Chemosensors Targeting Interleukin-1β Biomarker
Source: MDPI journal article supplement (doi:10.3390/bios13121013), 2023-12-05
Supplement: s1 [file s1]

## Supporting Information

# Mobile Point-of-Care Device Using Molecularly Imprinted Polymer-Based Chemosensors Targeting Interleukin-1 $\beta$ Biomarker

Rowoon Park <sup>1,†</sup>, Sangheon Jeon <sup>1,†</sup>, Jae Won Lee <sup>1,†</sup>, Jeonghwa Jeong <sup>1</sup>, Young Woo Kwon <sup>2</sup>, Sung Hyun Kim <sup>2</sup>, Joonkyung Jang <sup>3</sup> and Dong-Wook Han <sup>1</sup> and Suck Won Hong <sup>1,2,\*</sup>

<sup>1</sup> Department of Cogno-Mechatronics Engineering, Department of Optics and Mechatronics Engineering, College of Nanoscience and Nanotechnology, Pusan National University, Busan 46241, Republic of Korea; rowoon.p153@gmail.com (R.P.); jsfhse@pusan.ac.kr (S.J.); jik904@pusan.ac.kr (J.W.L.); jh.jeong@pusan.ac.kr (J.J.); nanohan@pusan.ac.kr (D.-W.H.)

<sup>2</sup> Engineering Research Center for Color Modulation Extrasensory Cognitive Technology, Pusan National University, Busan 46241, Republic of Korea; handmade4522@gmail.com (Y.W.K.); ksh1332@pusan.ac.kr (S.H.K.)

<sup>3</sup> Department of Nanoenergy Engineering, Pusan National University, Busan 46241, Republic of Korea; jkjang@pusan.ac.kr

\* Correspondence: swhong@pusan.ac.kr

<sup>†</sup> These authors contributed equally to this work.

\*Correspondence should be addressed to S.W.H. (email: swhong@pusan.ac.kr)

**KEYWORDS:** molecularly imprinted polymers, interleukin-1 $\beta$ , cytokine, electrochemical impedance spectroscopy, point-of-care testing

**Table S1.** Series of the ink types, according to the ratio of graphite flakes/carbon particles and the specific viscosity.

|        | Content of Graphite | Viscosity (Cps)     |
|--------|---------------------|---------------------|
| Type 1 | ~25%                | 40,000 $\pm$ 20000  |
| Type 2 | ~21.4%              | 34,500 $\pm$ 17,000 |
| Type 3 | ~18.8%              | 30,000 $\pm$ 15,000 |

**Table S2.** Hydrogen bond parameters between the EBT and the 16 amino acid molecules. Phenylalanine (Phe), Arginine (Arg), Leucine (Leu), and Valine (Val) are only located in the secondary structures, such as the  $\beta$ -sheet structure. It should be noted that these secondary structures are located inside the IL-1 $\beta$  protein, which does not participate in hydrogen bonds except for some terminal groups.

| Molecule structure   | Energy of the spatial structure (Hartree) | Binding energy of amino acid-EBT (kJ mol <sup>-1</sup> ) | Hydrogen bond Length (Å) | Mulliken charge of targeting Oxygen ( $\delta$ ) |
|----------------------|-------------------------------------------|----------------------------------------------------------|--------------------------|--------------------------------------------------|
| <b>EBT</b>           | <b>-1857.420101</b>                       | <b>free monomer</b>                                      |                          |                                                  |
| Alanine (Ala)        | -248.422666                               | Template amino acid                                      |                          |                                                  |
| EBT-Ala (1)          | -2105.837524                              | 13.765                                                   | 1.89                     | -0.420                                           |
| EBT-Ala (2)          | -2105.833687                              | 23.840                                                   | 1.95                     | -0.578                                           |
| EBT-Ala (3)          | -2105.813399                              | 77.106                                                   | 2.32                     | -0.655                                           |
| EBT-Ala (4)          | -2105.830806                              | 31.404                                                   | 1.55                     | -0.333                                           |
| <b>EBT-Ala total</b> |                                           | <b>146.115</b>                                           |                          |                                                  |
| Aspartic Acid (Asp)  | -436.346837                               | Template amino acid                                      | -                        | -                                                |
| EBT-Asp (1)          | -2293.759472                              | 19.602                                                   | 2.03                     | -0.462                                           |
| EBT-Asp (2)          | -2293.736226                              | 53.798                                                   | 2.33                     | -0.527                                           |
| EBT-Asp (3)          | -2293.740248                              | 80.635                                                   | 2.62                     | -0.640                                           |
| EBT-Asp (4)          | -2293.746447                              | 70.075                                                   | 2.80                     | -0.285                                           |
| <b>EBT-Asp total</b> |                                           | <b>224.110</b>                                           |                          |                                                  |
| Glutamic Acid (Glu)  | -475.643492                               | Template amino acid                                      | -                        | -                                                |
| EBT-Glu (1)          | -2333.058907                              | 12.302                                                   | 2.35                     | -0.526                                           |
| EBT-Glu (2)          | -2333.051405                              | 32.000                                                   | 2.57                     | -0.442                                           |
| EBT-Glu (3)          | -2333.039015                              | 64.530                                                   | 2.77                     | -0.590                                           |
| EBT-Glu (4)          | -2333.046408                              | 45.121                                                   | 2.31                     | -0.321                                           |
| <b>EBT-Glu total</b> |                                           | <b>153.953</b>                                           |                          |                                                  |
| Glycine (Gly)        | -209.100112                               | Template amino acid                                      |                          |                                                  |
| EBT-Gly (1)          | -2066.510703                              | 24.969                                                   | 2.08                     | -0.408                                           |
| EBT-Gly (2)          | -2066.519264                              | 2.492                                                    | 2.13                     | -0.577                                           |
| EBT-Gly (3)          | -2066.512807                              | 19.444                                                   | 2.54                     | -0.630                                           |
| EBT-Gly (4)          | -2066.513079                              | 18.730                                                   | 2.21                     | -0.302                                           |
| <b>EBT-Gly total</b> |                                           | <b>65.635</b>                                            |                          |                                                  |
| Asparagine (Asn)     | -417.051539                               | Template amino acid                                      |                          |                                                  |
| EBT-Asn (1)          | -2274.468174                              | 9.100                                                    | 2.49                     | -0.473                                           |
| EBT-Asn (2)          | -2274.457040                              | 38.333                                                   | 2.54                     | -0.451                                           |
| EBT-Asn (3)          | -2274.449125                              | 59.113                                                   | 2.67                     | -0.626                                           |
| EBT-Asn (4)          | -2274.441440                              | 79.291                                                   | 2.33                     | -0.280                                           |
| <b>EBT-Asn total</b> |                                           | <b>185.837</b>                                           |                          |                                                  |

| Molecule structure   | Energy of the spatial structure (Hartree) | Binding energy of amino acid-EBT (kJ mol <sup>-1</sup> ) | Hydrogen bond Length (Å) | Mulliken charge of targeting Oxygen ( $\delta$ ) |
|----------------------|-------------------------------------------|----------------------------------------------------------|--------------------------|--------------------------------------------------|
| Proline (Pro)        | -325.795736                               | Template amino acid                                      | -                        | -                                                |
| EBT-Pro (1)          | -2183.206075                              | 25.630                                                   | 2.25                     | -0.393                                           |
| EBT-Pro (2)          | -2183.215328                              | 1.337                                                    | 2.84                     | -0.583                                           |
| EBT-Pro (3)          | -2183.215603                              | 0.615                                                    | 2.22                     | -0.640                                           |
| EBT-Pro (4)          | -2183.212880                              | 7.764                                                    | 2.39                     | -0.311                                           |
| <b>EBT-Pro total</b> |                                           | <b>35.345</b>                                            |                          |                                                  |
| Glutamine (Gln)      | -456.345712                               | Template amino acid                                      | -                        | -                                                |
| EBT-Gln (1)          | -2313.763244                              | <b>6.745</b>                                             | 2.38                     | -0.483                                           |
| EBT-Gln (2)          | -2313.734143                              | 83.149                                                   | 2.20                     | -0.597                                           |
| EBT-Gln (3)          | -2313.722483                              | 113.764                                                  | 2.14                     | -0.642                                           |
| EBT-Gln (4)          | -2313.754975                              | 28.455                                                   | 2.58                     | -0.289                                           |
| <b>EBT-Gln total</b> |                                           | <b>232.113</b>                                           |                          |                                                  |
| Serine (Ser)         | -323.584919                               | Template amino acid                                      | -                        | -                                                |
| EBT-Ser (1)          | -2180.988028                              | 44.612                                                   | 2.42                     | -0.492                                           |
| EBT-Ser (2)          | -2180.982213                              | 59.880                                                   | 2.34                     | -0.617                                           |
| EBT-Ser (3)          | -2180.992089                              | 33.950                                                   | 2.44                     | -0.614                                           |
| EBT-Ser (4)          | -2181.003416                              | 4.211                                                    | 2.21                     | -0.305                                           |
| <b>EBT-Ser total</b> |                                           | <b>142.653</b>                                           |                          |                                                  |
| Threonine (Thr)      | -362.886784                               | Template amino acid                                      | -                        | -                                                |
| EBT-Thr (1)          | -2220.300411                              | 16.997                                                   | 2.13                     | -0.669                                           |
| EBT-Thr (2)          | -2220.305235                              | 4.332                                                    | 2.76                     | -0.576                                           |
| EBT-Thr (3)          | -2220.294442                              | 32.669                                                   | 2.81                     | -0.642                                           |
| EBT-Thr (4)          | -2220.306882                              | 0.008                                                    | 2.66                     | -0.297                                           |
| <b>EBT-Thr total</b> |                                           | <b>54.006</b>                                            |                          |                                                  |
| Lysine (Lys)         | -422.096607                               | Template amino acid                                      |                          |                                                  |
| EBT-Lys (1)          | -2279.493463                              | 61.030                                                   | 2.03                     | -0.625                                           |
| EBT-Lys (2)          | -2279.507590                              | 23.940                                                   | 2.15                     | -0.579                                           |
| EBT-Lys (3)          | -2279.491325                              | 66.643                                                   | 2.58                     | -0.629                                           |
| EBT-Lys (4)          | -2279.510807                              | 15.493                                                   | 2.15                     | -0.400                                           |
| <b>EBT-Lys total</b> |                                           | <b>167.106</b>                                           |                          |                                                  |
| Tyrosine (Tyr)       | -554.556305                               | Template amino acid                                      |                          |                                                  |
| EBT-Tyr (1)          | -2411.964316                              | 31.742                                                   | 2.31                     | -0.649                                           |
| EBT-Tyr (2)          | -2411.957141                              | 50.580                                                   | 2.48                     | -0.586                                           |
| EBT-Tyr (3)          | -2411.965785                              | 27.885                                                   | 2.72                     | -0.639                                           |
| EBT-Tyr (4)          | -2411.962481                              | 36.561                                                   | 2.52                     | -0.284                                           |
| <b>EBT-Tyr total</b> |                                           | <b>146.768</b>                                           |                          |                                                  |

| Molecule structure   | Energy of the spatial structure (Hartree) | Binding energy of amino acid-EBT (kJ mol <sup>-1</sup> ) | Hydrogen bond Length (Å) | Mulliken charge of targeting Oxygen ( $\delta$ ) |
|----------------------|-------------------------------------------|----------------------------------------------------------|--------------------------|--------------------------------------------------|
| Methionine (Met)     | -725.157334                               | Template amino acid                                      | -                        | -                                                |
| EBT-Met (1)          | -2582.567942                              | 24.924                                                   | 2.63                     | -0.643                                           |
| EBT-Met (2)          | -2582.564610                              | 33.672                                                   | 2.65                     | -0.598                                           |
| EBT-Met (3)          | -2582.564858                              | 33.021                                                   | 2.65                     | -0.632                                           |
| EBT-Met (4)          | -2582.571693                              | 15.076                                                   | 2.43                     | -0.301                                           |
| <b>EBT-Met total</b> |                                           | <b>106.693</b>                                           |                          |                                                  |
| Phenylalanine (Phe)  | -479.383724                               | Template amino acid                                      | -                        | -                                                |
| EBT-Phe (1)          | -2336.794185                              | 25.310                                                   | 4.32                     | -0.621                                           |
| EBT-Phe (2)          | -2336.803707                              | 0.310                                                    | 2.33                     | -0.440                                           |
| EBT-Phe (3)          | -2336.803673                              | 0.401                                                    | 5.62                     | -0.600                                           |
| EBT-Phe (4)          | -2336.803558                              | 0.699                                                    | 6.80                     | -0.301                                           |
| <b>EBT-Phe total</b> |                                           | <b>26.72</b>                                             |                          |                                                  |
| Arginine (Arg)       | -531.593043                               | Template amino acid                                      | -                        | -                                                |
| EBT-Arg (1)          | -2389.006119                              | 18.444                                                   | 2.44                     | -0.664                                           |
| EBT-Arg (2)          | -2389.004026                              | 23.940                                                   | 2.47                     | -0.431                                           |
| EBT-Arg (3)          | -2388.980147                              | 86.633                                                   | 2.99                     | -0.607                                           |
| EBT-Arg (4)          | -2388.984379                              | 75.523                                                   | 3.24                     | -0.341                                           |
| <b>EBT-Arg total</b> |                                           | <b>204.54</b>                                            |                          |                                                  |
| Leucine (Leu)        | -366.306240                               | Template amino acid                                      |                          |                                                  |
| EBT-Leu (1)          | -2223.718982                              | 19.321                                                   | 4.54                     | -0.637                                           |
| EBT-Leu (2)          | -2223.721631                              | 12.365                                                   | 4.31                     | -0.451                                           |
| EBT-Leu (3)          | -2223.725918                              | 1.111                                                    | 4.92                     | -0.632                                           |
| EBT-Leu (4)          | -2223.726051                              | 0.761                                                    | 5.40                     | -0.343                                           |
| <b>EBT-Leu total</b> |                                           | <b>33.558</b>                                            |                          |                                                  |
| Valine (Val)         | -323.216119                               | Template amino acid                                      |                          |                                                  |
| EBT-Val (1)          | -2180.629608                              | 17.361                                                   | 3.11                     | -0.661                                           |
| EBT-Val (2)          | -2180.630982                              | 13.752                                                   | 2.87                     | -0.451                                           |
| EBT-Val (3)          | -2180.628172                              | 21.131                                                   | 3.07                     | -0.636                                           |
| EBT-Val (4)          | -2180.626796                              | 24.744                                                   | 3.42                     | -0.330                                           |
| <b>EBT-Val total</b> |                                           | <b>76.988</b>                                            |                          |                                                  |

**Table S3.** Binding energy between EBT and the amino acid in protein sequence of IL-1 $\beta$ .

| <b>Amino acid</b>      | <b>Abbreviation</b> | <b>Frequency</b> | <b>Active site</b> | <b>Binding energy<br/>(kJ mol<sup>-1</sup>)</b> |
|------------------------|---------------------|------------------|--------------------|-------------------------------------------------|
| Alanine                | Ala, A              | 5                | 2                  | 146.115                                         |
| Aspartic Acid          | Asp, D              | 8                | 6                  | 224.11                                          |
| Glutamic Acid          | Glu, E              | 11               | 6                  | 153.953                                         |
| Glycine                | Gly, G              | 8                | 5                  | 65.635                                          |
| Asparagine             | Asn, N              | 9                | 6                  | 185.837                                         |
| Proline                | Pro, P              | 8                | 5                  | 35.345                                          |
| Glutamine              | Gln, Q              | 12               | 10                 | 232.113                                         |
| Serine                 | Ser, S              | 14               | 2                  | 142.653                                         |
| Threonine              | Thr, T              | 6                | 2                  | 54.006                                          |
| Lysine                 | Lys, K              | 15               | 6                  | 167.106                                         |
| Tyrosine               | Tyr, Y              | 4                | 2                  | 146.768                                         |
| Methionine             | Met, M              | 6                | 2                  | 106.693                                         |
| <b>Total frequency</b> |                     | 153              | 58                 |                                                 |

**Table S4.** Atomic composition and concentration of stepwise-modified surfaces of SPCE at each fabrication step.

| Sample                                           | Atomic concentration (%) |      |      |      |
|--------------------------------------------------|--------------------------|------|------|------|
|                                                  | C 1s                     | O 1s | N 1s | S 2p |
| PEDOT film                                       | 88.1                     | 10.5 | None | 1.4  |
| 4-AMP/PEDOT film                                 | 82.0                     | 10.6 | 4.7  | 2.7  |
| PEBT/4-AMP/PEDOT film with IL-1 $\beta$ template | 73.3                     | 15.8 | 7.0  | 3.9  |

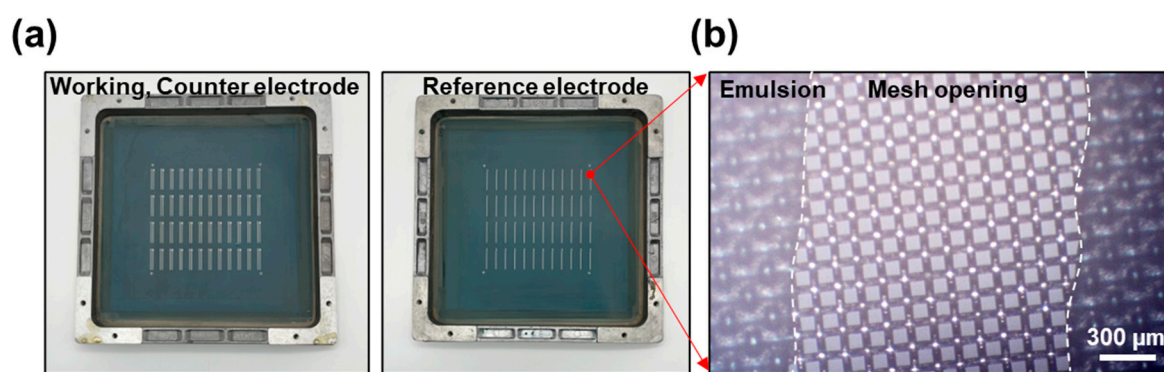

**Figure S1.** (a) Digital image of screen-printed masks for printing a three-channel electrode pattern; the opening area are only exposed to the carbon ink. (b) Optical image showing the channel region defined in the screen mask.



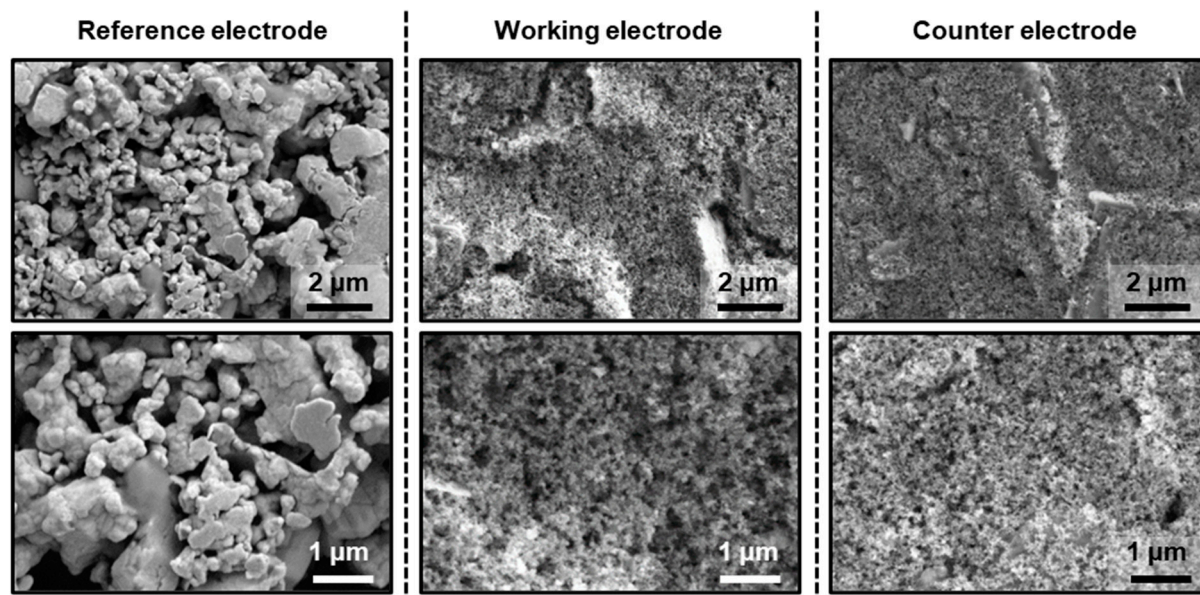

**Figure S2.** SEM images representing the surface morphology of screen-printed working and counter carbon electrodes with Ag/AgCl reference.

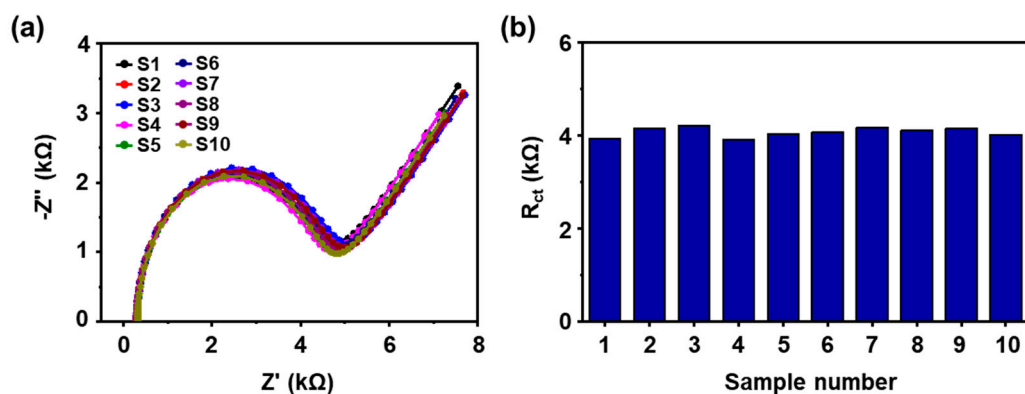

**Figure S3.** The Nyquist plot (a) and corresponding  $R_{ct}$  value (b) after pretreatment of the customized SPCE; the pretreatment was performed using CV under -0.65–1.05 V potential range, 50  $mV s^{-1}$  scan rate, 10 cycles in 0.5 M  $H_2SO_4$  solution.

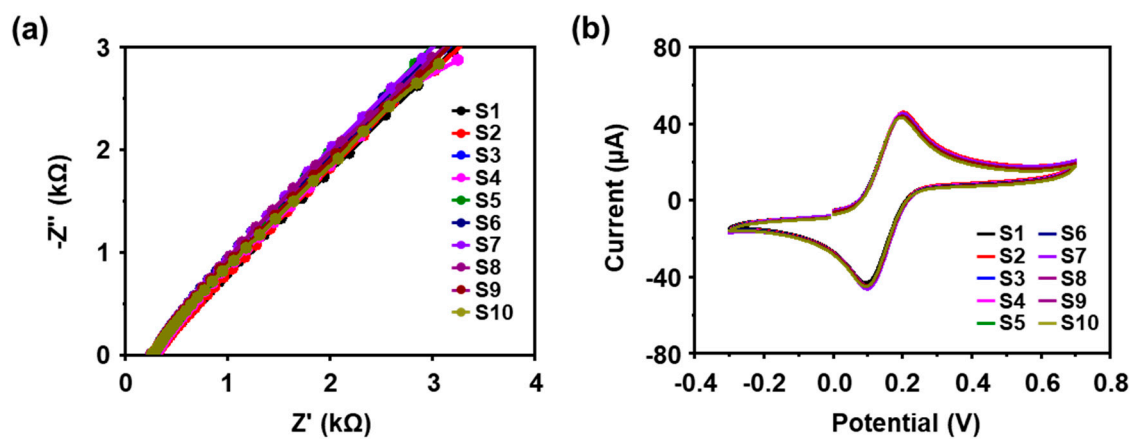

**Figure S4.** The Nyquist plot (a) and CV voltammogram (b) after electrochemical deposition of PEDOT on SPCE surface; each PEDOT film was electropolymerized using CA under a fixed potential (10 s at 0.9 V) in 0.1 M PBS buffer.

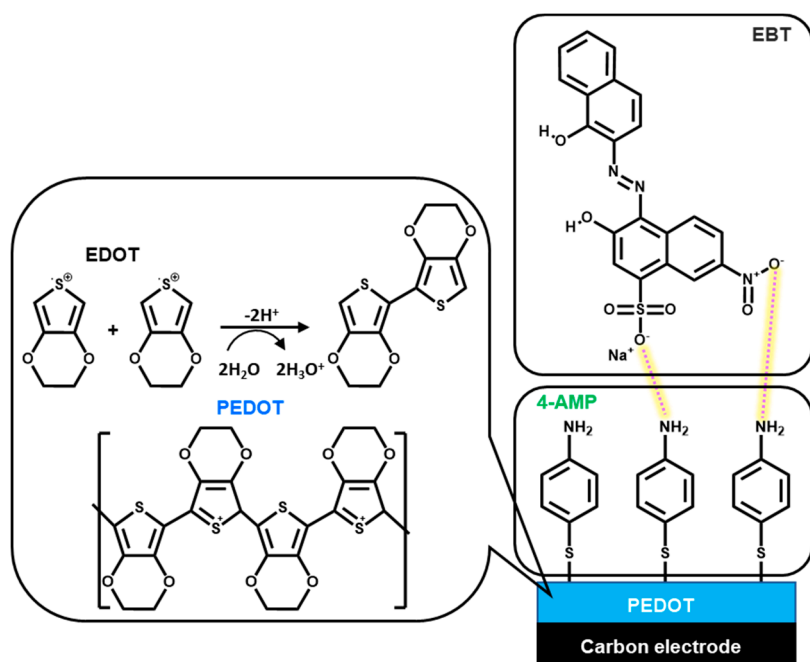

**Figure S5.** Schematic diagram of a MIP-based biosensor fabricated on a SPCE: sequentially composed of a PEDOT film, a 4-AMP monolayer, and a PEBT film.

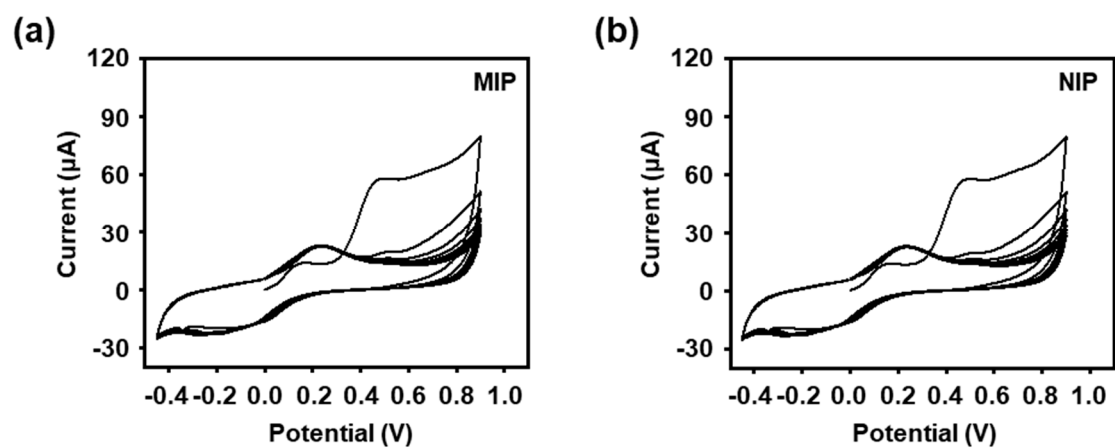

**Figure S6.** Consecutive CV curves obtained during the electrodeposition of EBT on the 4-AMP/PEDOT/SPCE (a) with and (b) without IL-1 $\beta$  templates.

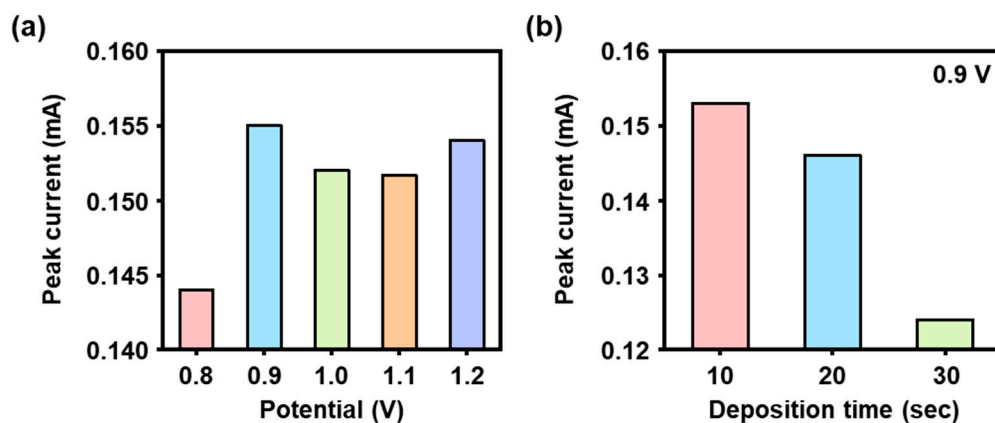

**Figure S7.** Electrochemical response of PEDOT film on SPCE surface electropolymerized by adjusting deposition voltage (a) and time (b); each peak current was obtained using CV under the parametric condition of a -0.3–0.1 V potential range and  $100 \text{ mV s}^{-1}$  scan rate in PBS solution ( $\text{pH} = 7.4$ ) containing 5 mM of  $[\text{Fe}(\text{CN})_6]^{3-/4-}$ .

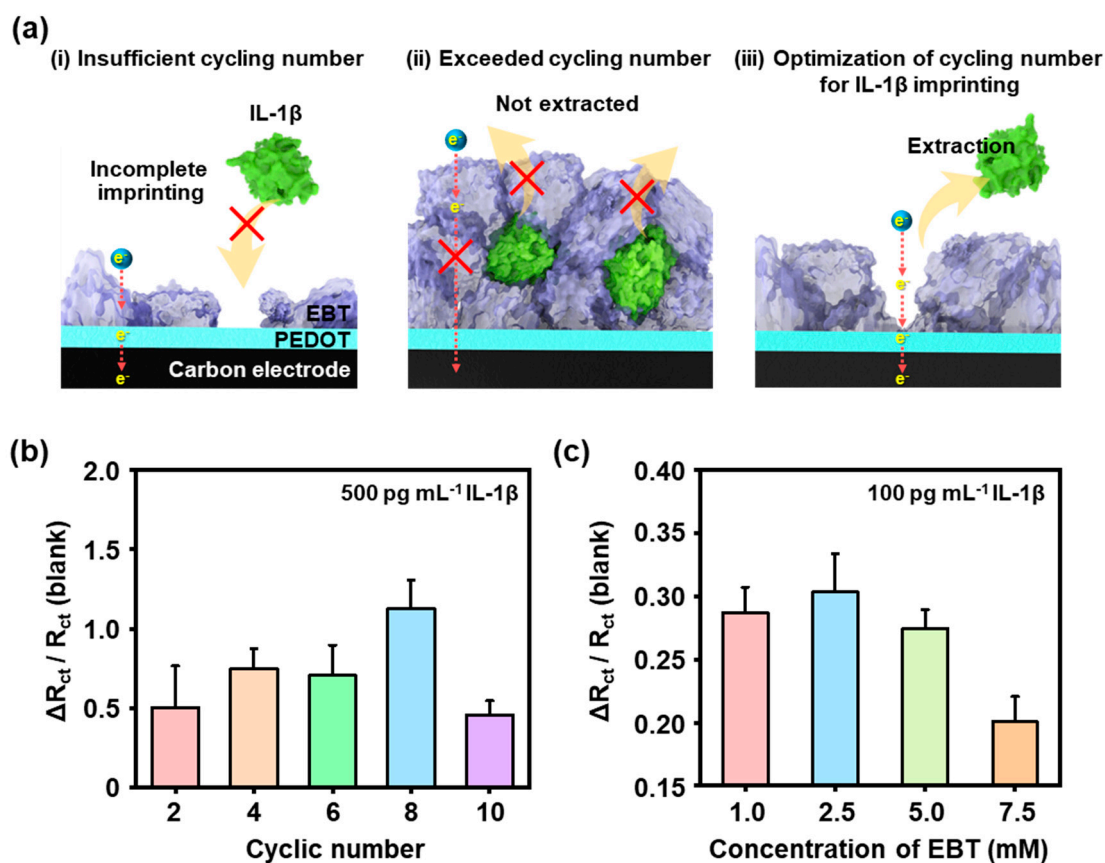

**Figure S8.** (a) Schematic illustration representing the correlation between the thickness of the MIP matrix and the reliability of the MIP-based biosensor: (i) incomplete imprinting, (ii) entrapped IL-1 $\beta$  templates by a thick PEBT film, and (iii) the formation of the optimized MIP thickness adjustment for IL-1 $\beta$ . The influence of the number of polymerization cycles (b) and the monomer/template concentration ratios (c) to survey the impedimetric response of the PEBT-based MIP sensor to IL-1 $\beta$ .

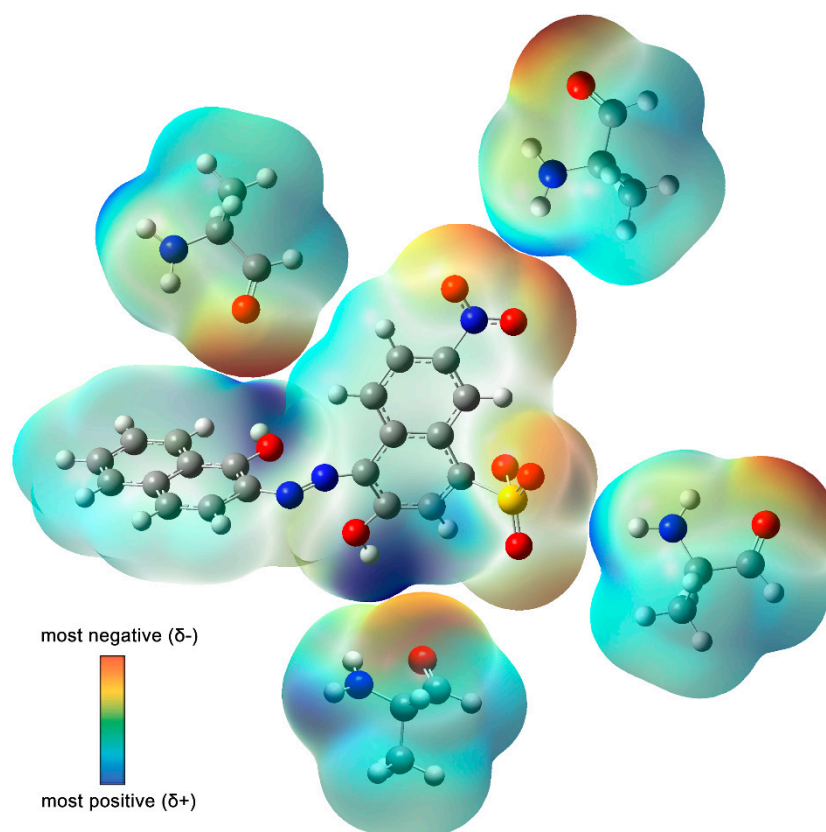

**Figure S9.** The docking structures (i.e., before hydrogen bond formation) of the amino acid (alanine) tem-plates with EBT monomer, describing the sites of dipole ( $\delta^-$ )–dipole ( $\delta^+$ ) interactions. The heatmap displays the electrostatic potential mapping on the isovalue surface at a total electron density of 0.0004 using the self-consistent field method. Because the continuous carbon skeleton of the amino acid is connected to the terminal group, a neutral molecular orbital is not formed for a single sequence. Therefore, in the simulation, the terminals of the amino acid chain were hy-drogenated to assume a neutral structure.



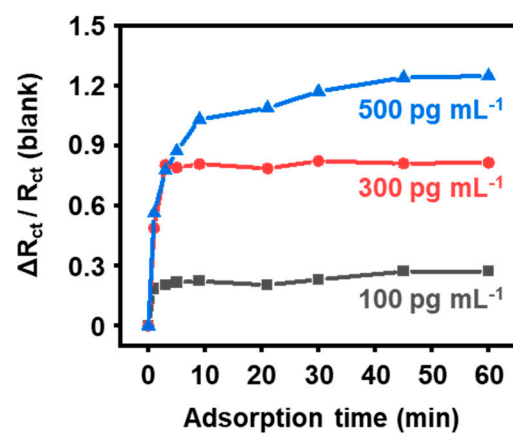

**Figure S10.** The normalized  $\Delta R_{ct}/R_{ct}(\text{blank})$  values as a function of the incubation time were derived from Nyquist plots obtained through dynamic EIS response for the MIP films.  $R_{ct}(\text{blank})$  signifies the measured  $R_{ct}$  value of the MIP film before incubation in the specific concentration of IL-1 $\beta$  standard solution.

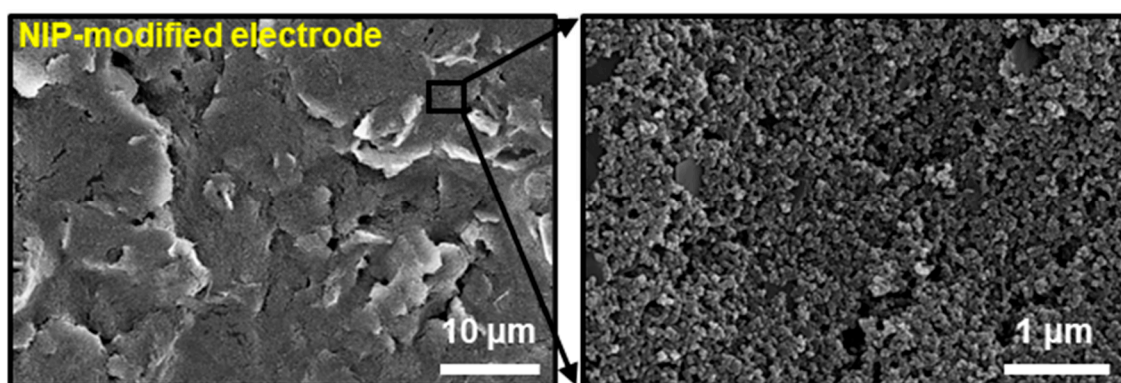

**Figure S11.** SEM images showing the surface morphology of NIP films fabricated on 4-AMP/PEDOT/SPCE.

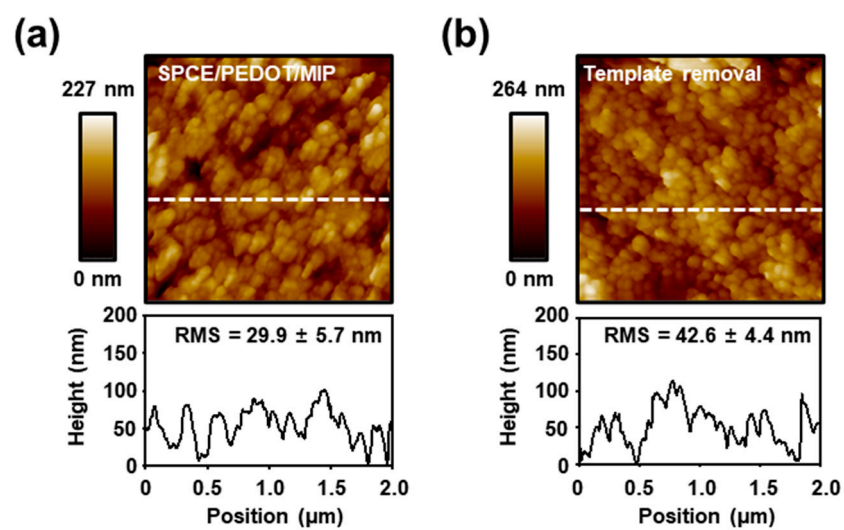

**Figure S12.** AFM images for topological features of the MIP film (a) before and (b) after the extraction of IL-1 $\beta$  templates.

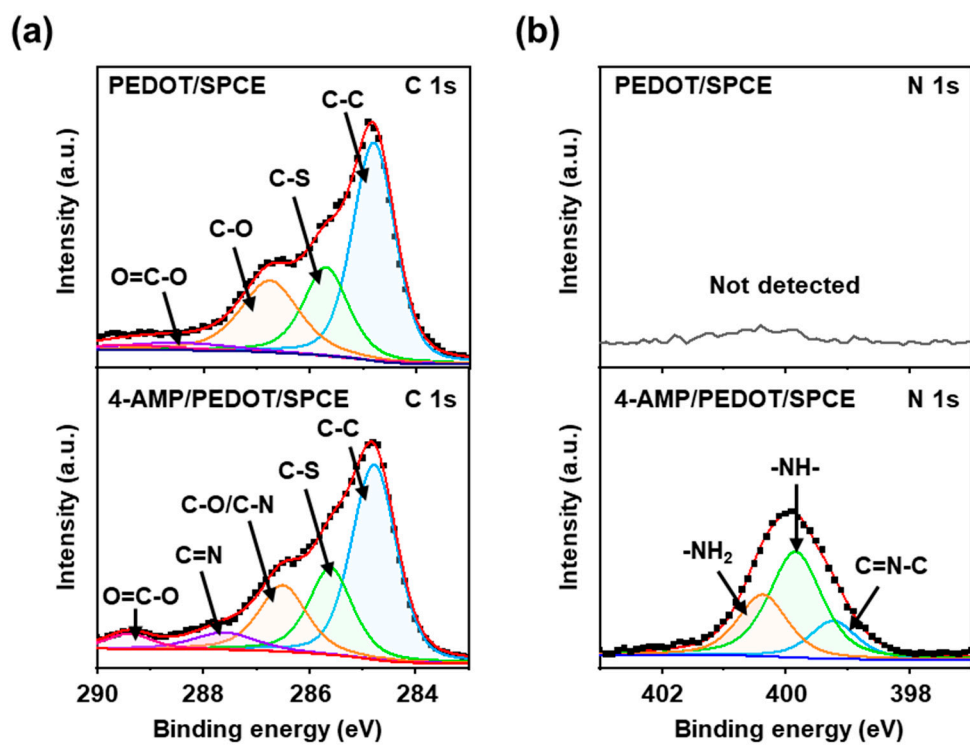

**Figure S13.** High-resolution XPS spectra of (a) PEDOT/SPCE and (b) 4-AMP/PEDOT/SPCE before the electrodeposition of EBT with IL-1 $\beta$  template.

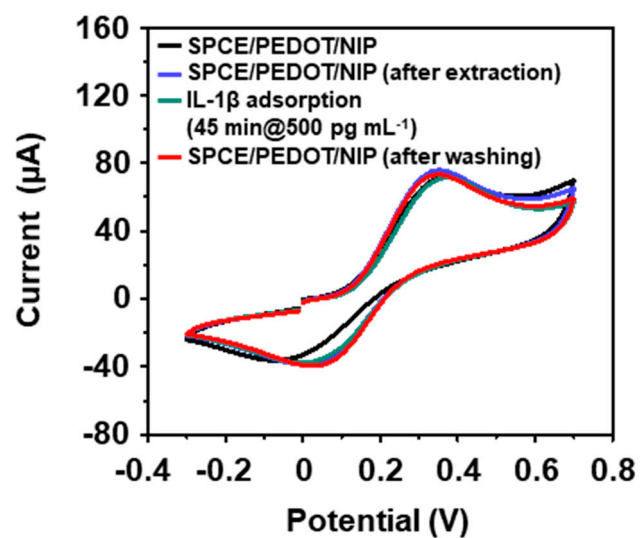

**Figure S14.** Electrochemical behaviors of NIP/4-AMP/PEDOT/SPCE according to the stepwise-fabrication process measured using CV in 0.01 M PBS (pH 7.2) containing the 5 mM  $[\text{Fe}(\text{CN})_6]^{3-/4-}$  redox probe.
